# Supplementary material for: In situ formation of lithium fast-ion conductors and improved hydrogen desorption properties of the LiNH2–MgH2 system with the addition of lithium halides
Source: Royal Society of Chemistry journal article supplement (doi:10.1039/c3ta14331g), 2014-01-01
Supplement: c3ta14331g.pdf [file c3ta14331g.pdf]

## Electronic Supplementary Information

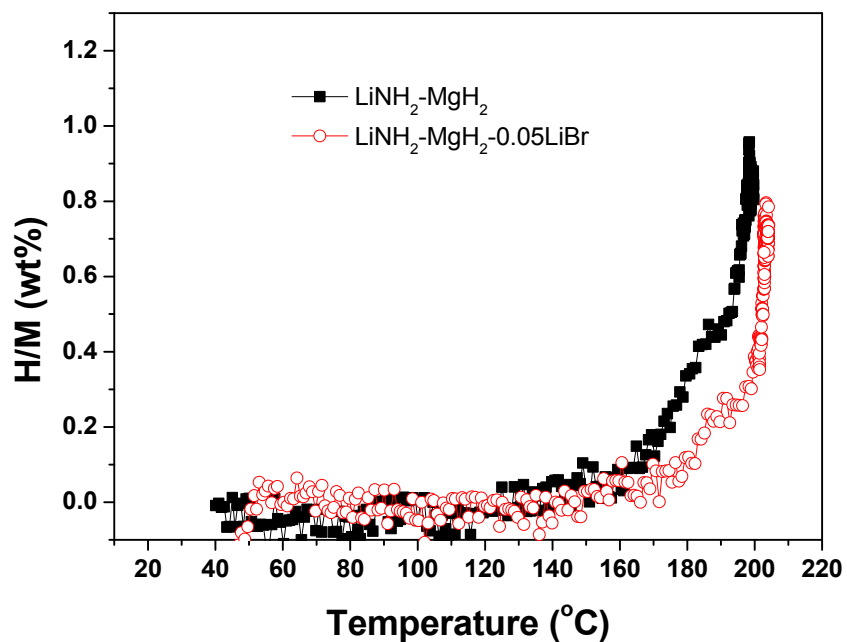

**Fig. S1** Hydrogenation curves of the fully dehydrogenated LiNH<sub>2</sub>-MgH<sub>2</sub> and LiNH<sub>2</sub>-MgH<sub>2</sub>-0.05LiBr samples under 100 bar of H<sub>2</sub> pressure.
